# Supplementary material for: Engineering well-expressed, V2-immunofocusing HIV-1 envelope glycoprotein membrane trimers for use in heterologous prime-boost vaccine regimens
Source: PubMed Central journal article supplement (PMC8565784; doi:10.1371/journal.ppat.1009807), 2021-10-22
Supplement: ppat.1009807.s005.pdf [file ppat.1009807.s005.pdf]

S5 Fig (page 1)

JR-FL gp120

Apex view

LHS

RHS

A

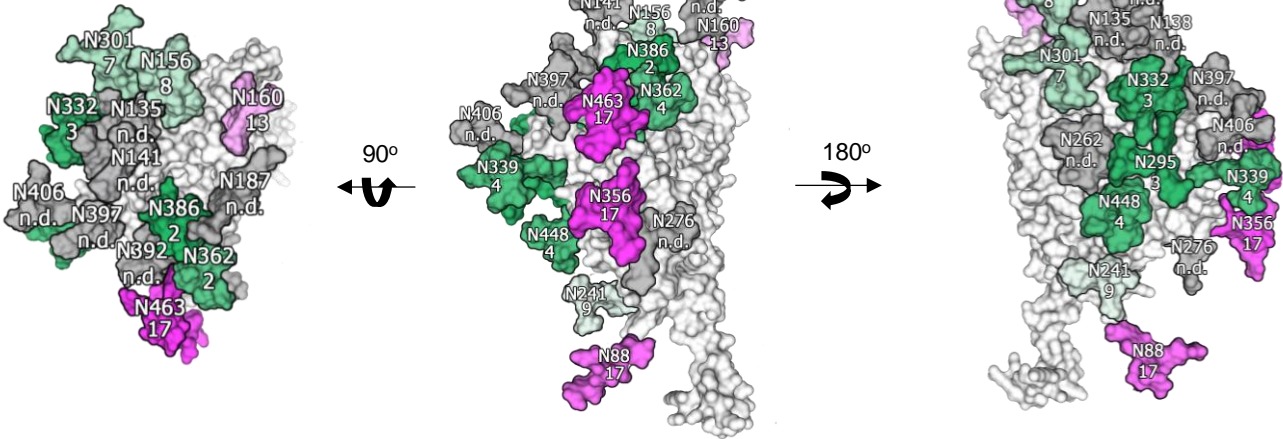

B

JR-FL SOS  
"old" parent

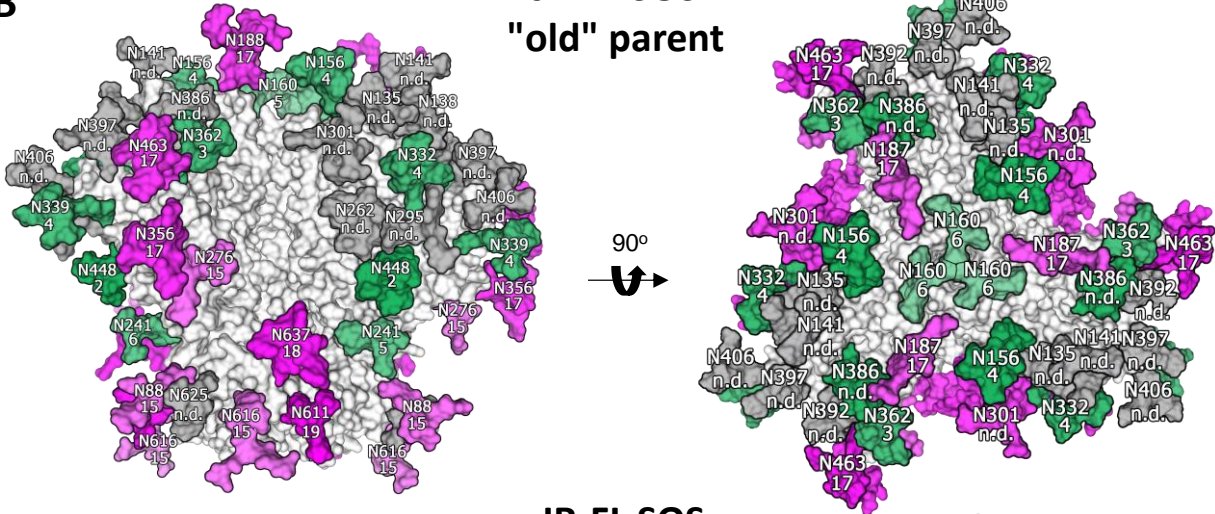

C

JR-FL SOS  
"new" parent

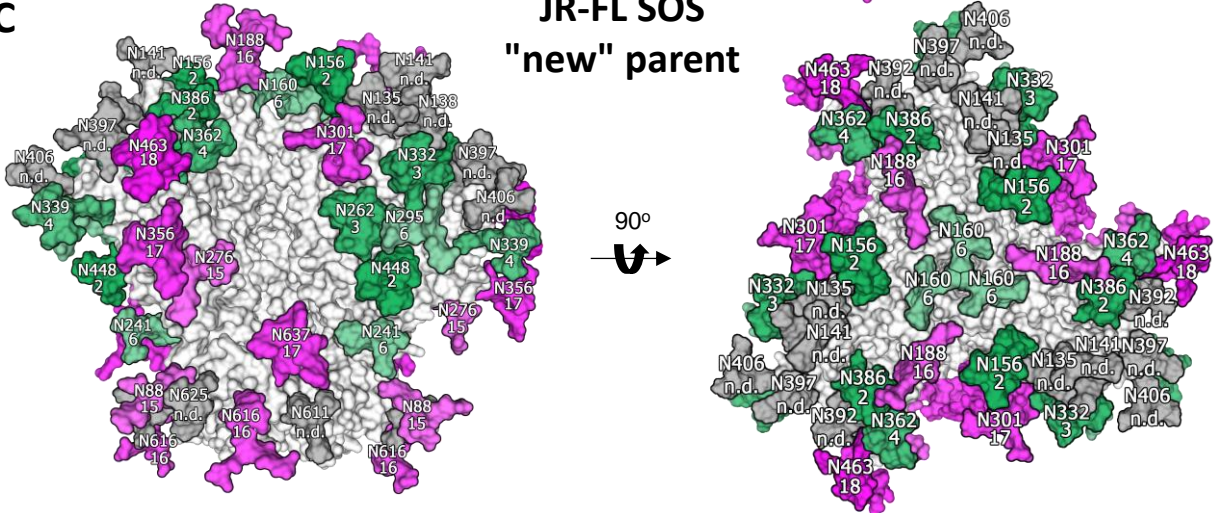

| 1     | 2  | 3  | 4  | 5  | 6  | 7  | 8  | 9  | 10     | 11      | 12           | 13              | 14           | 15              | 16           | 17              | 18            | 19               |
|-------|----|----|----|----|----|----|----|----|--------|---------|--------------|-----------------|--------------|-----------------|--------------|-----------------|---------------|------------------|
| M9Glc | M9 | M8 | M7 | M6 | M5 | M4 | M3 | FM | HYBRID | FHYBRID | HexNAc(3)(x) | HexNAc(3)(F)(x) | HexNAc(4)(x) | HexNAc(4)(F)(x) | HexNAc(5)(x) | HexNAc(5)(F)(x) | HexNAc(6+)(x) | HexNAc(6+)(F)(x) |



D197N knock in

F

4. D197N

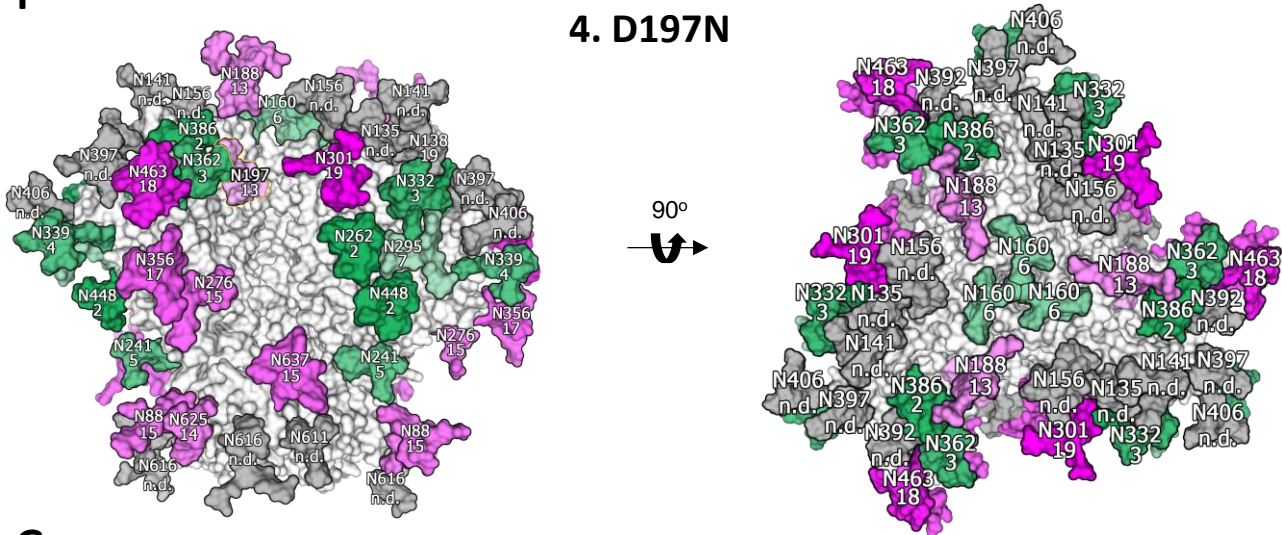

G

5. D197N + S199T

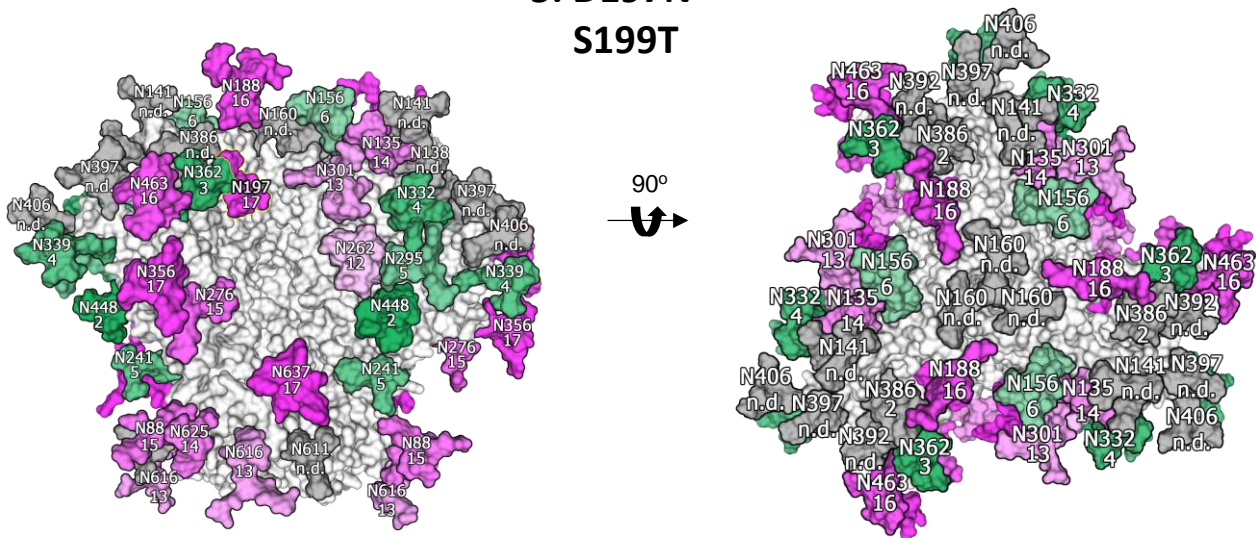

| 1     | 2  | 3  | 4  | 5  | 6  | 7  | 8  | 9  | 10     | 11      | 12           | 13              | 14           | 15              | 16           | 17              | 18            | 19               |
|-------|----|----|----|----|----|----|----|----|--------|---------|--------------|-----------------|--------------|-----------------|--------------|-----------------|---------------|------------------|
| M9Glc | M9 | M8 | M7 | M6 | M5 | M4 | M3 | FM | HYBRID | FHYBRID | HexNAc(3)(x) | HexNAc(3)(F)(x) | HexNAc(4)(x) | HexNAc(4)(F)(x) | HexNAc(5)(x) | HexNAc(5)(F)(x) | HexNAc(6+)(x) | HexNAc(6+)(F)(x) |

T49N and N611Q

H

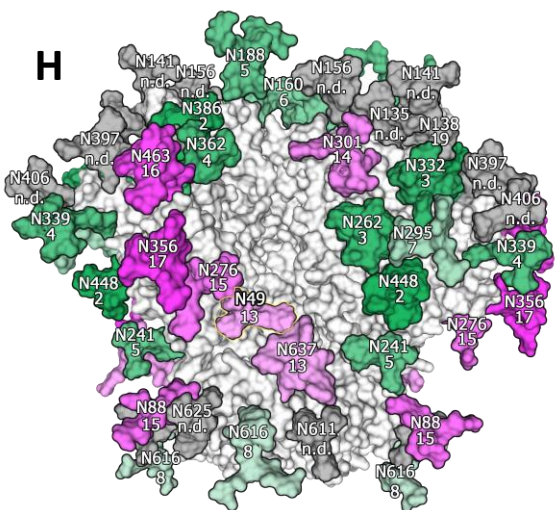

6. T49N

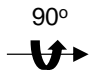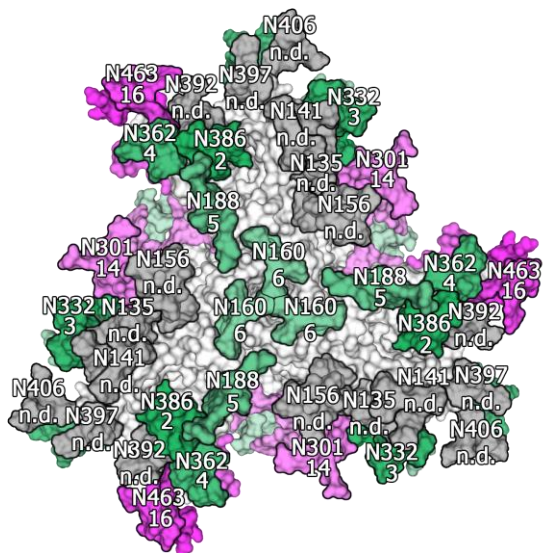

7. N611Q

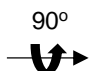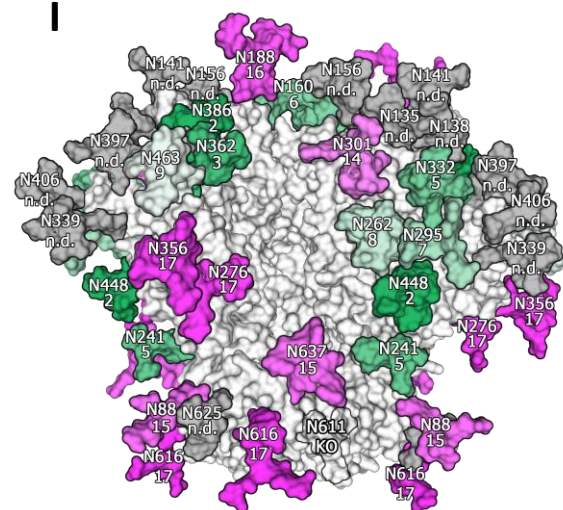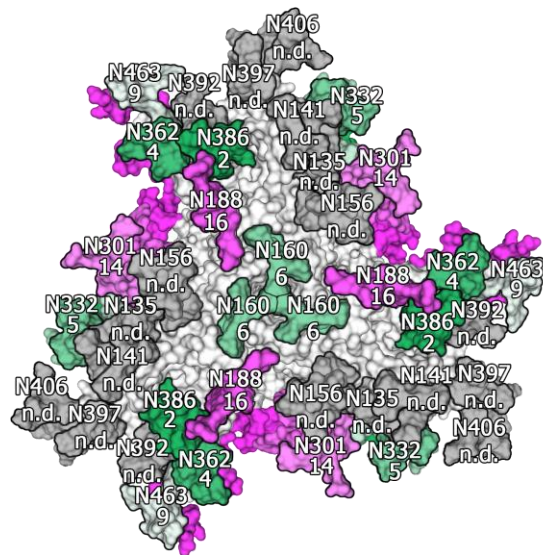

8. T49N + N611Q

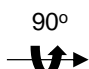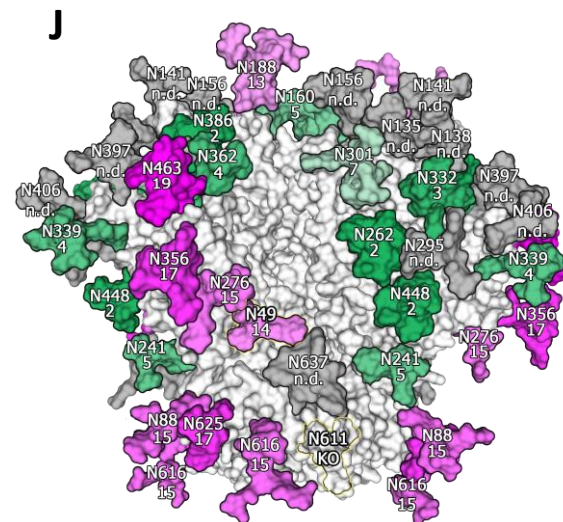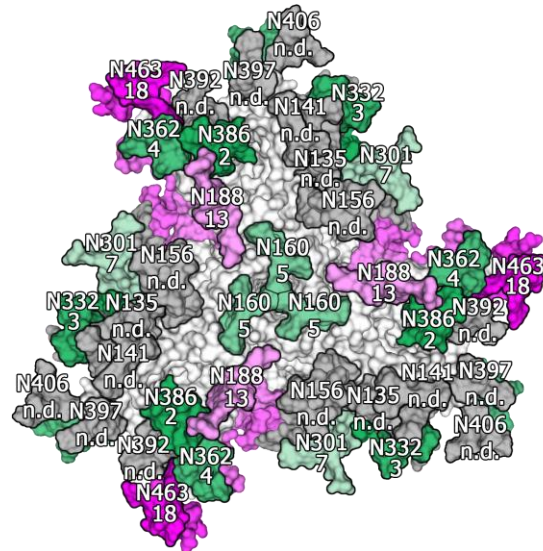

**K** CH01-bound glycovariants

**9. N138A + N141A**

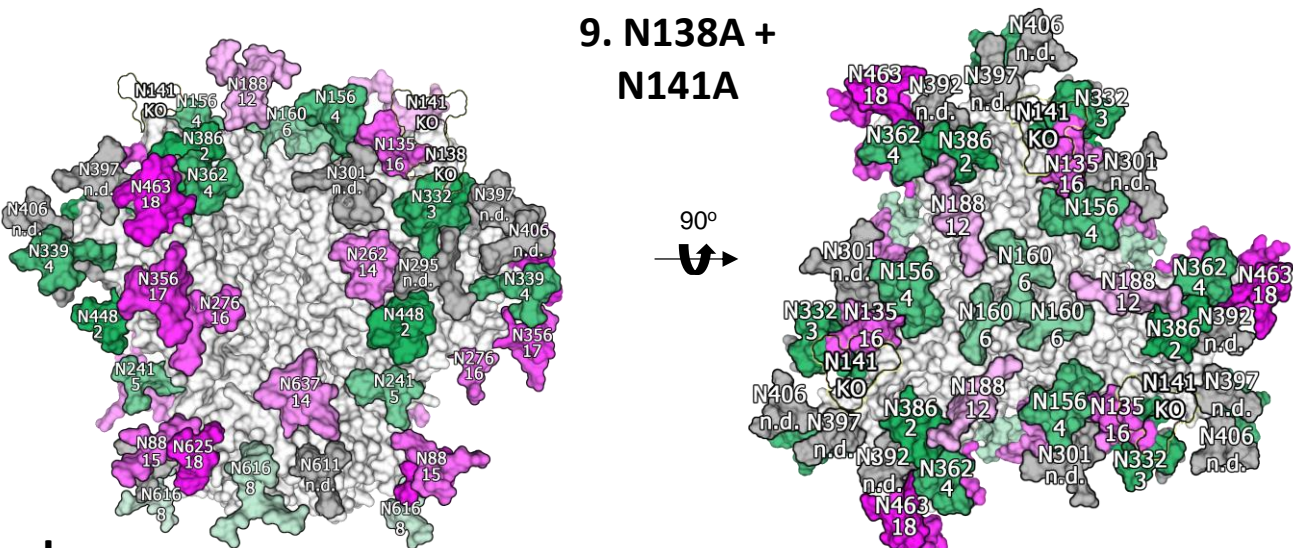

**10. N138A + N141A + CH01**

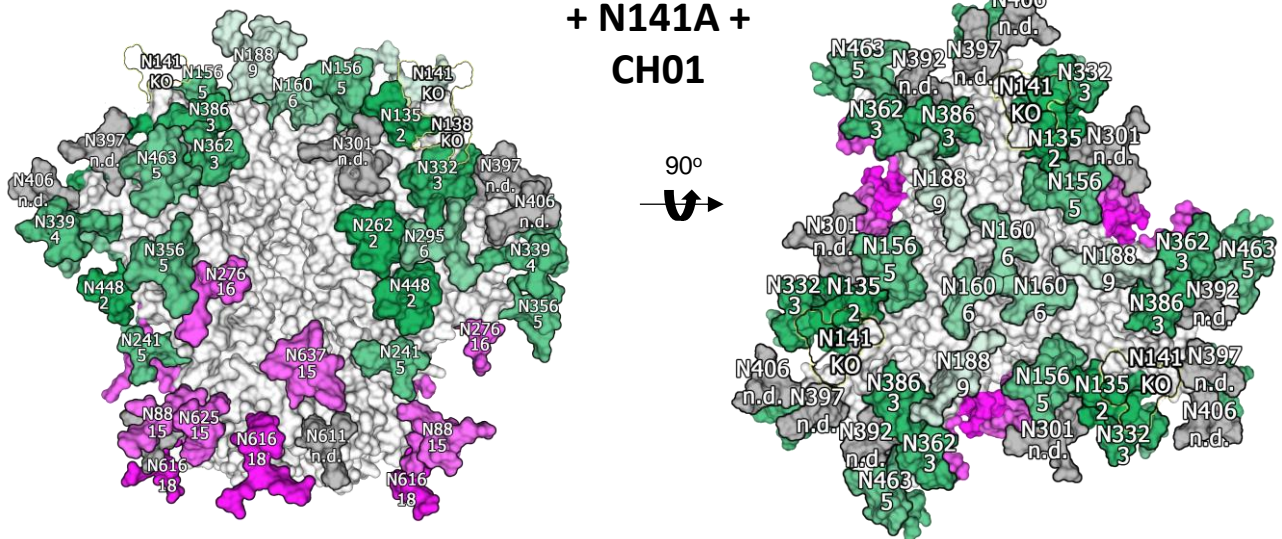

|       |    |    |    |    |    |    |    |    |        |         |              |                 |              |                 |              |                 |               |                  |
|-------|----|----|----|----|----|----|----|----|--------|---------|--------------|-----------------|--------------|-----------------|--------------|-----------------|---------------|------------------|
| 1     | 2  | 3  | 4  | 5  | 6  | 7  | 8  | 9  | 10     | 11      | 12           | 13              | 14           | 15              | 16           | 17              | 18            | 19               |
| M9Glc | M9 | M8 | M7 | M6 | M5 | M4 | M3 | FM | HYBRID | FHYBRID | HexNAc(3)(x) | HexNAc(3)(F)(x) | HexNAc(4)(x) | HexNAc(4)(F)(x) | HexNAc(5)(x) | HexNAc(5)(F)(x) | HexNAc(6+)(x) | HexNAc(6+)(F)(x) |
