# Supplementary material for: Engineering well-expressed, V2-immunofocusing HIV-1 envelope glycoprotein membrane trimers for use in heterologous prime-boost vaccine regimens
Source: PubMed Central journal article supplement (PMC8565784; doi:10.1371/journal.ppat.1009807), 2021-10-22
Supplement: ppat.1009807.s006.pdf [file ppat.1009807.s006.pdf]

**SCORE CHANGES**  
**JR-FL SOS VLP**  
**parent comparison**

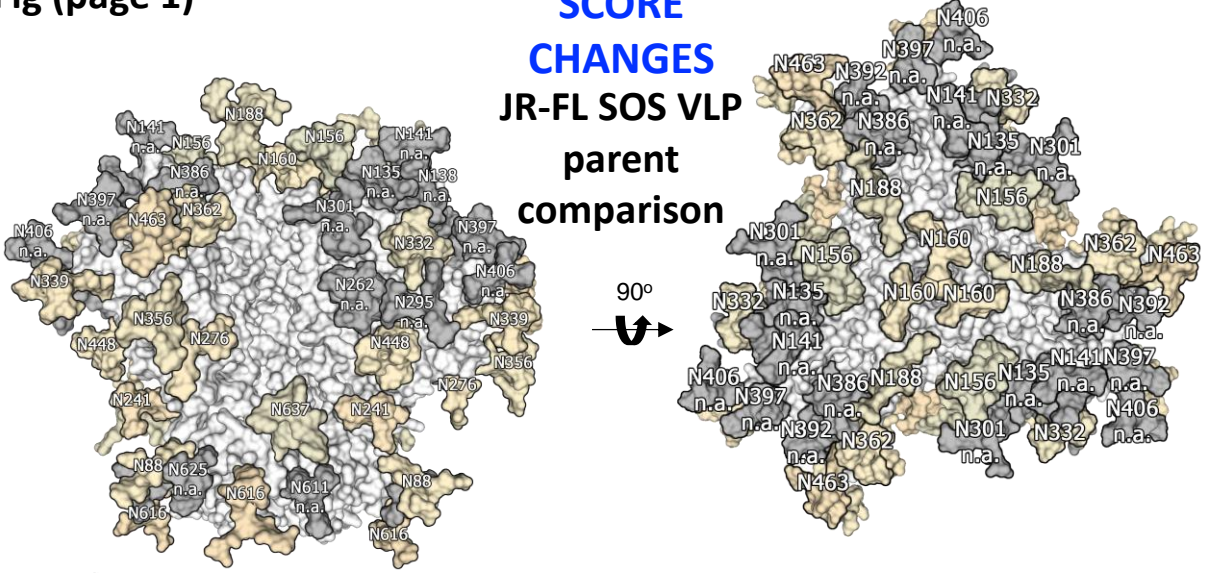

**JR-FL gp120 vs "new" Parent**

Apex view

LHS

RHS

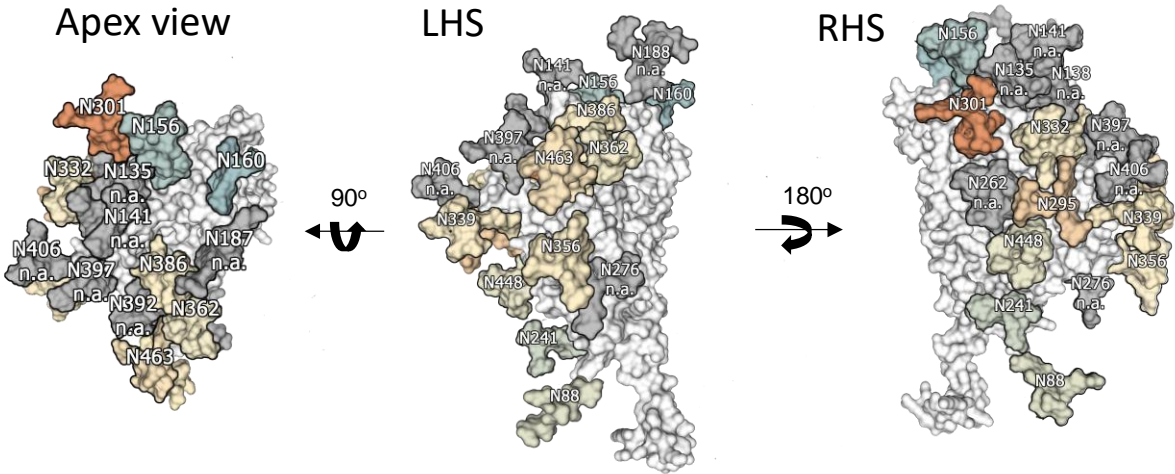

**JR-FL gp120 vs "old" Parent**

Apex view

LHS

RHS

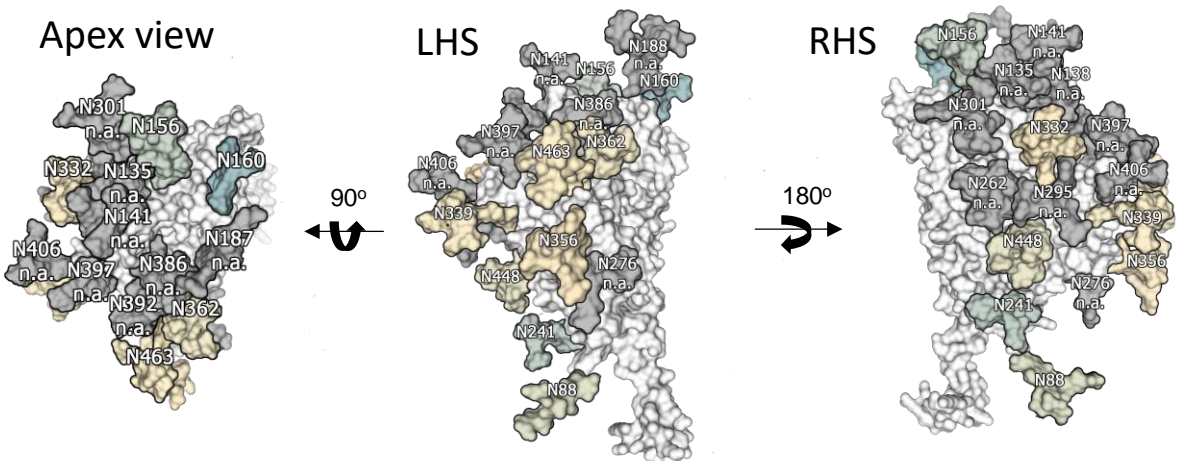

Score change

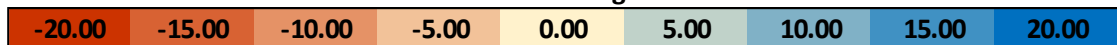

Decrease in Processing

Increase in Processing



**SCORE  
CHANGES**

**D197N vs Parent**

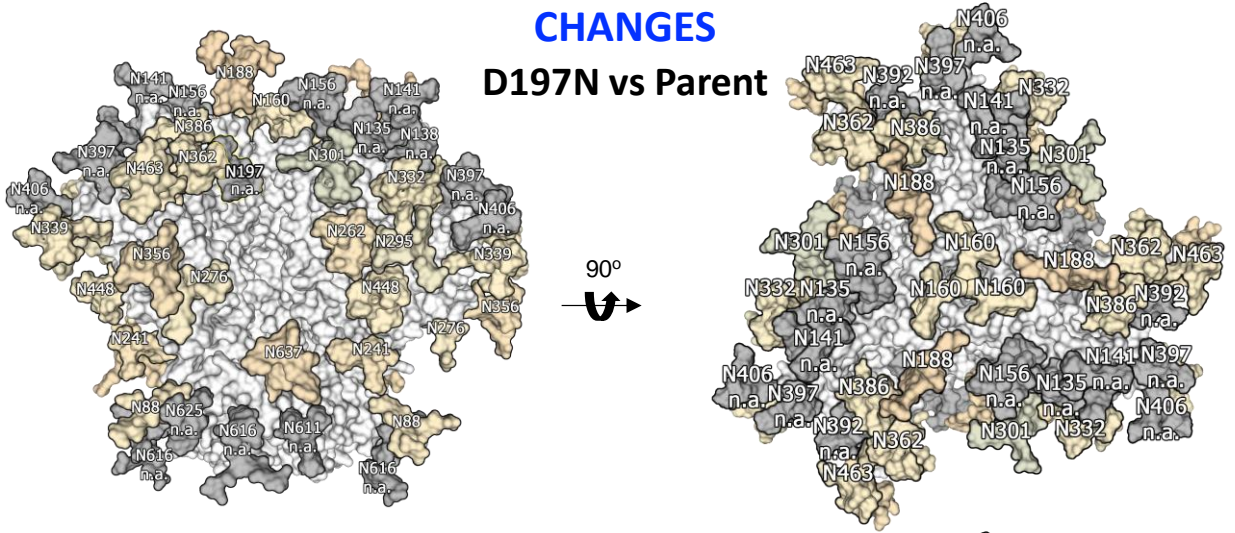

**D197N+S199T vs Parent**

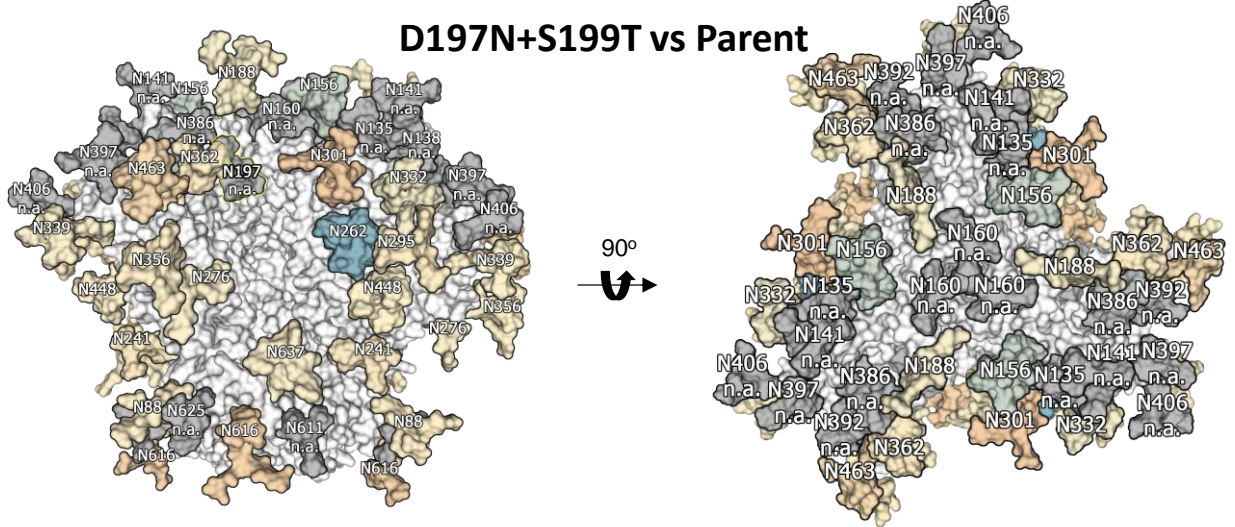

**D197N+S199T vs D197N**

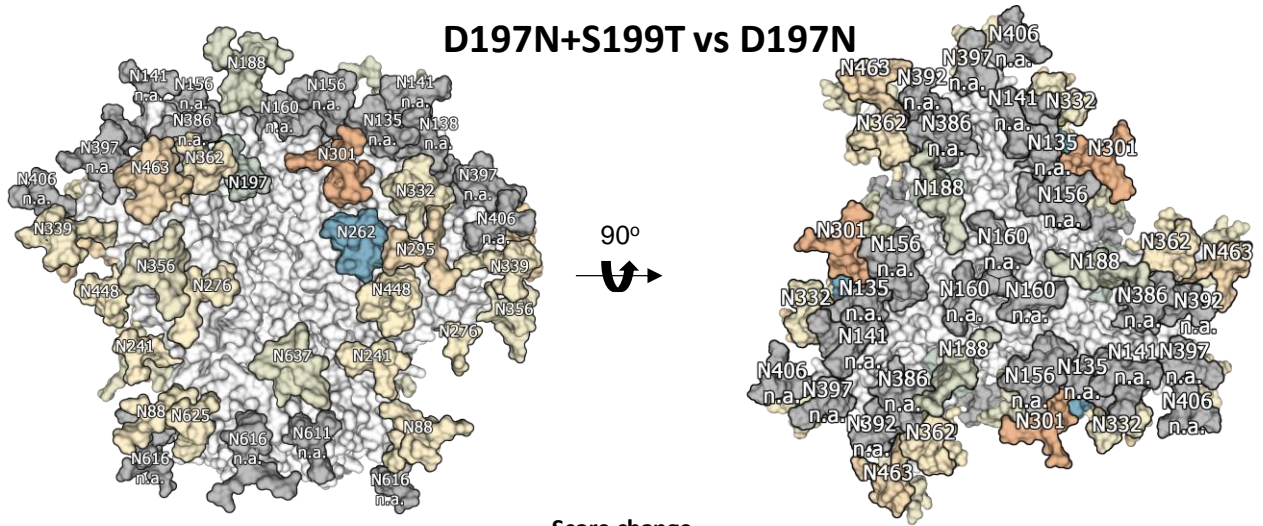

Score change

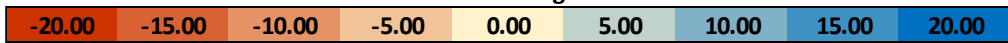

Decrease in  
Processing

Increase in  
Processing

S6 Fig (page 4)

# SCORE CHANGES

## T49N vs Parent

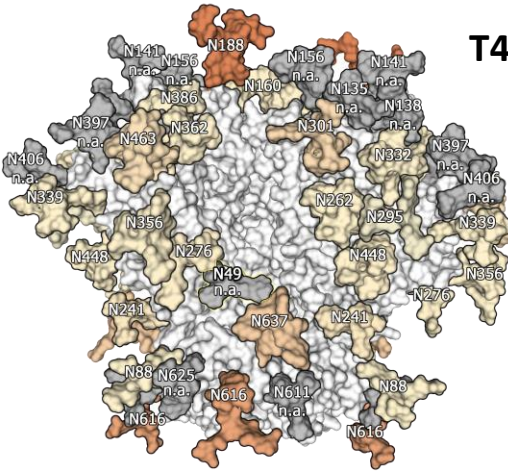

90°  
↻

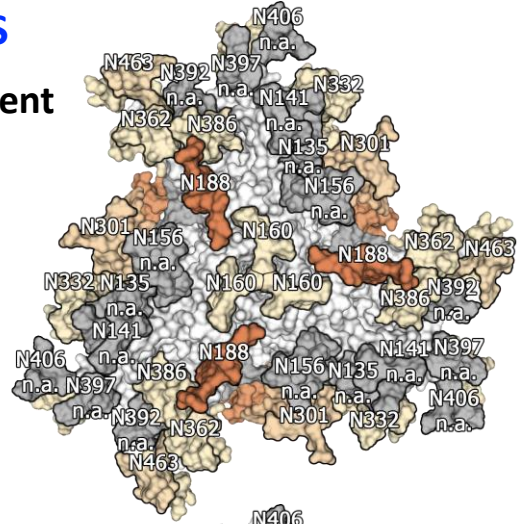

## N611Q vs Parent

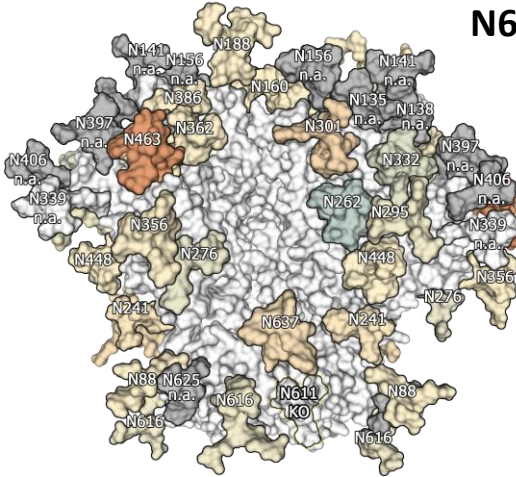

90°  
↻

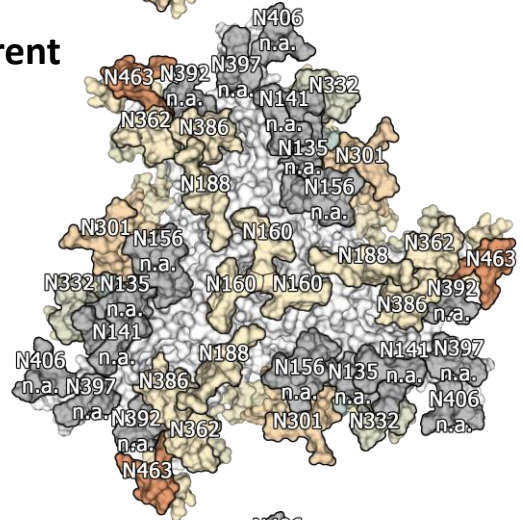

## T49N+N611Q vs Parent

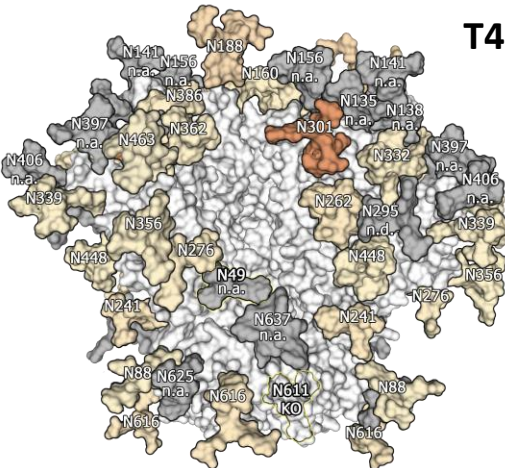

90°  
↻

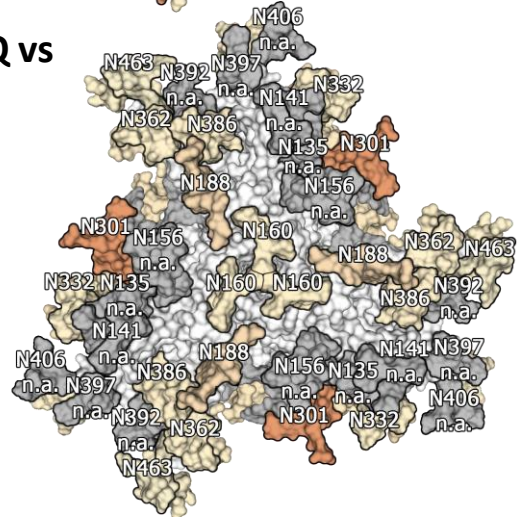

Score change

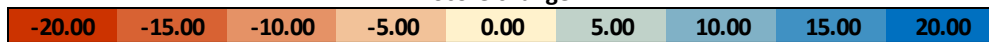

Decrease in Processing

Increase in Processing

**SCORE  
CHANGES**

**T49N+N611Q vs T49N**

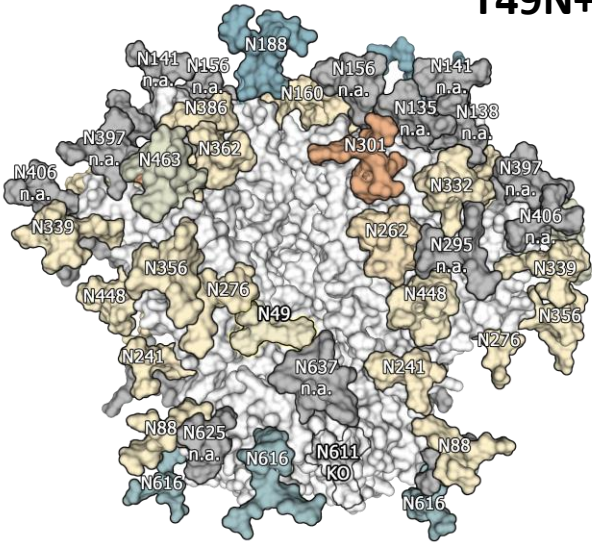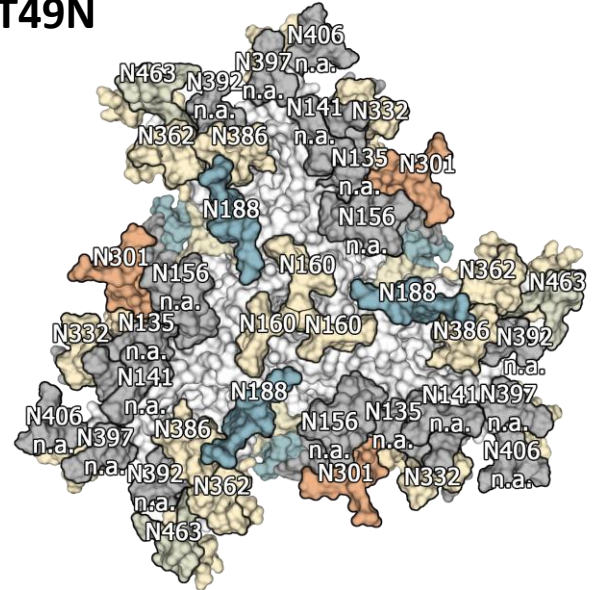

**T49N+N611Q vs N611Q**

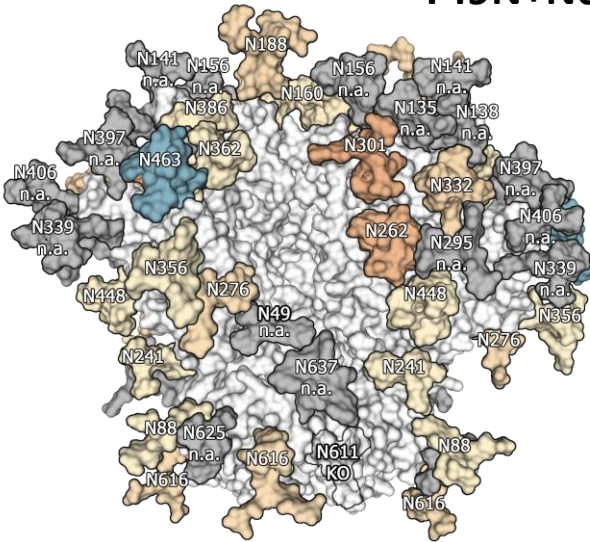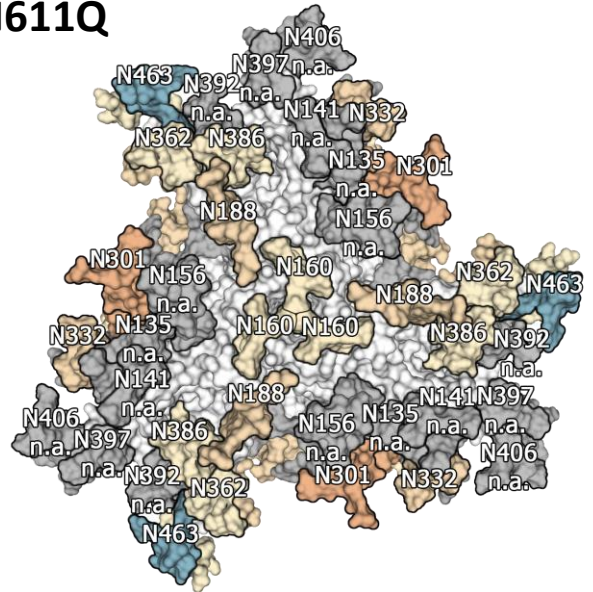

Score change

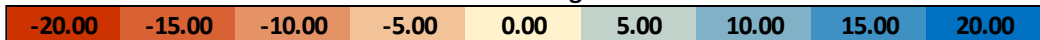

Decrease in  
Processing

Increase in  
Processing

**SCORE  
CHANGES**

**N138A+N141A vs Parent**

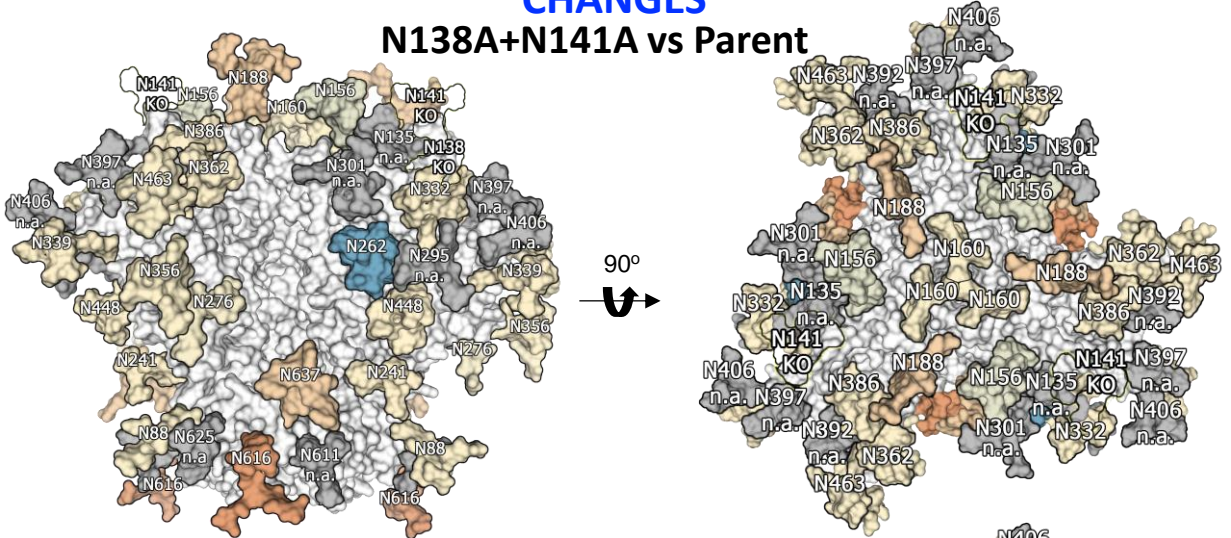

**N138A+N141A+CH01 vs Parent**

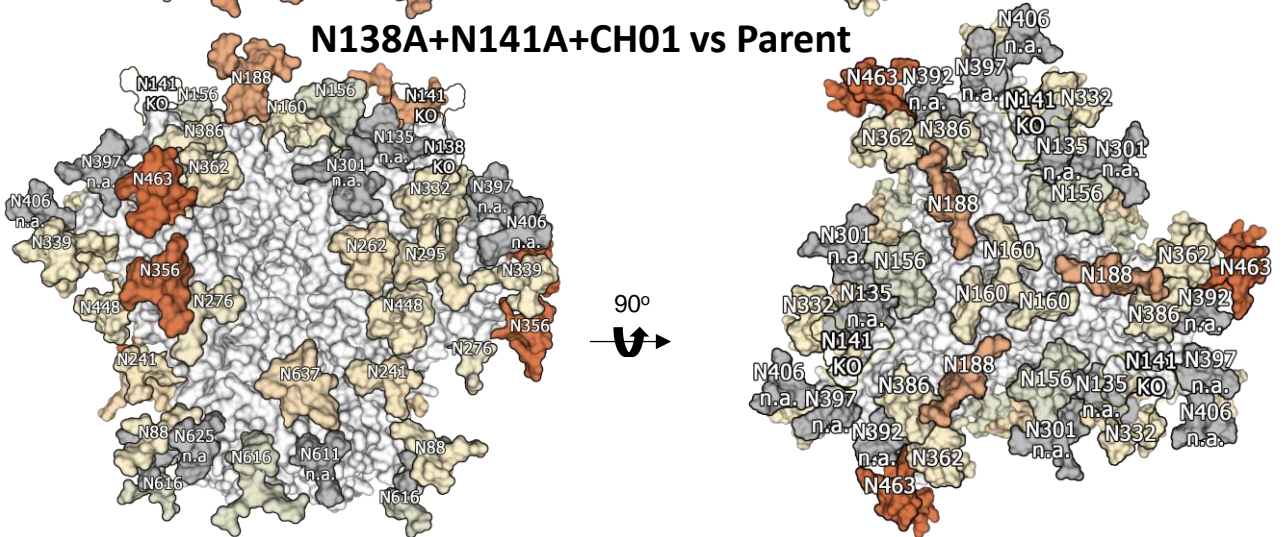

**N138A+N141A+CH01 vs N138A+N141A**

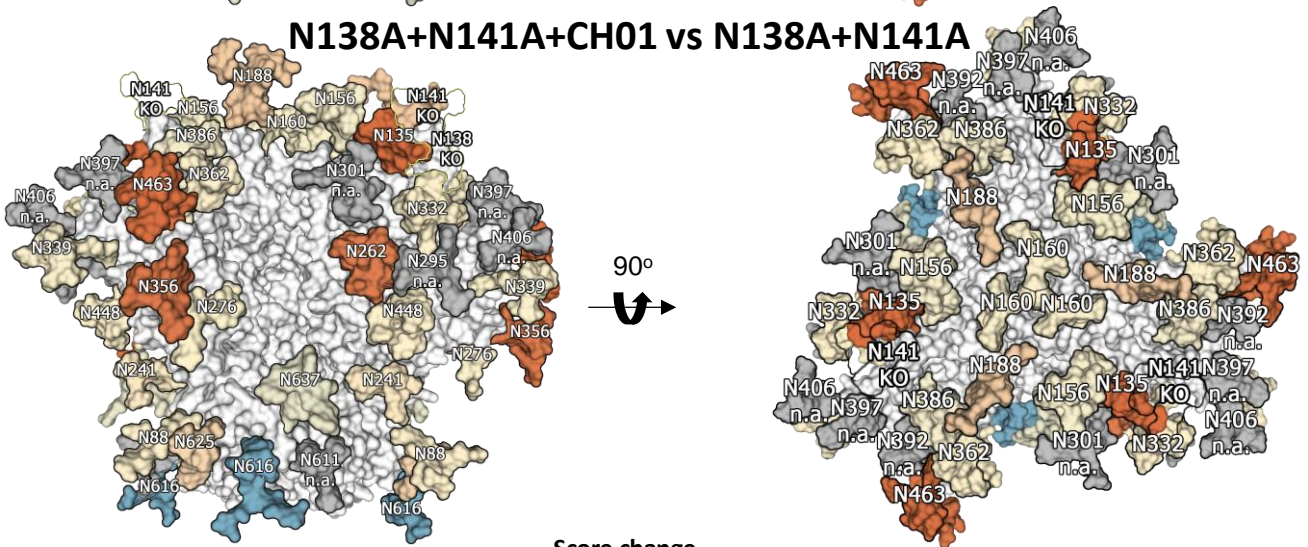

Score change

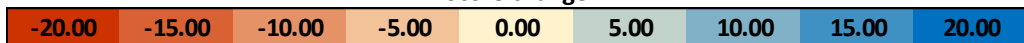

Decrease in  
Processing

Increase in  
Processing
